# Supplementary material
Source: PubMed Central journal article supplement (PMC4273400)
Supplement: pnas.201412107SI.pdf [file pnas.201412107SI.pdf]

# Supporting Information

Rashkovan et al. 10.1073/pnas.1412107111

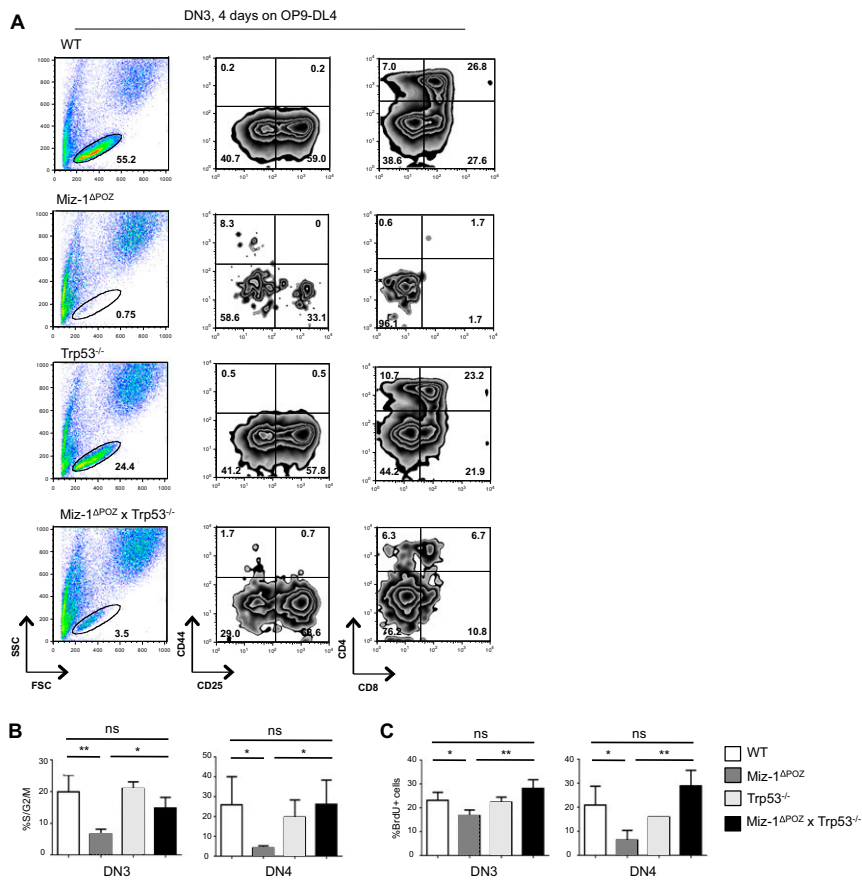

**Fig. S1.** Deletion of p53 restores the ability of Miz-1<sup>ΔPOZ</sup> pre-T cells to differentiate in vitro. (A) DN3 pre-T cells from WT, Miz-1<sup>ΔPOZ</sup>, Trp53<sup>-/-</sup>, and Miz-1<sup>ΔPOZ</sup> × Trp53<sup>-/-</sup> mice were sorted onto OP9-DL4 and analyzed for CD25, CD44, CD4, and CD8 surface expression after 4 d in culture. Data are representative of three independent experiments. (B) Cell cycle analysis using PI staining performed on sorted, permeabilized DN3 and DN4 cells. Graph shows percentages of cells in S/G2/M phases of the cell cycle. Data are averaged from three independent experiments and are presented as mean ± SD. (C) Cell cycle analysis after in vivo BrdU labeling. Graph shows percentages of BrdU<sup>+</sup> DN3 and DN4 cells. Data are averaged from three independent experiments and are presented as mean ± SD.

72h +  $\alpha$ CD3

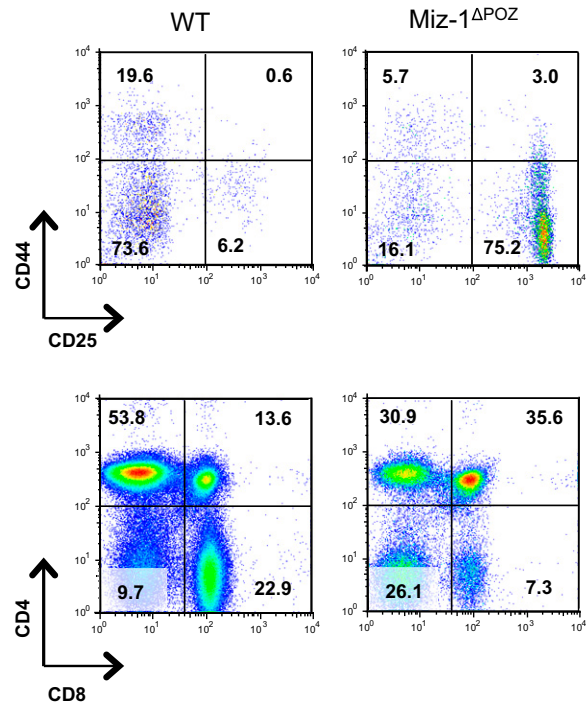

Fig. S2. Mitogenic stimulation of WT and Miz-1 $\Delta$ POZ pre-T cells. FACS analysis of WT and Miz-1 $\Delta$ POZ pre-T cells at 72 h after injection with  $\alpha$ CD3.

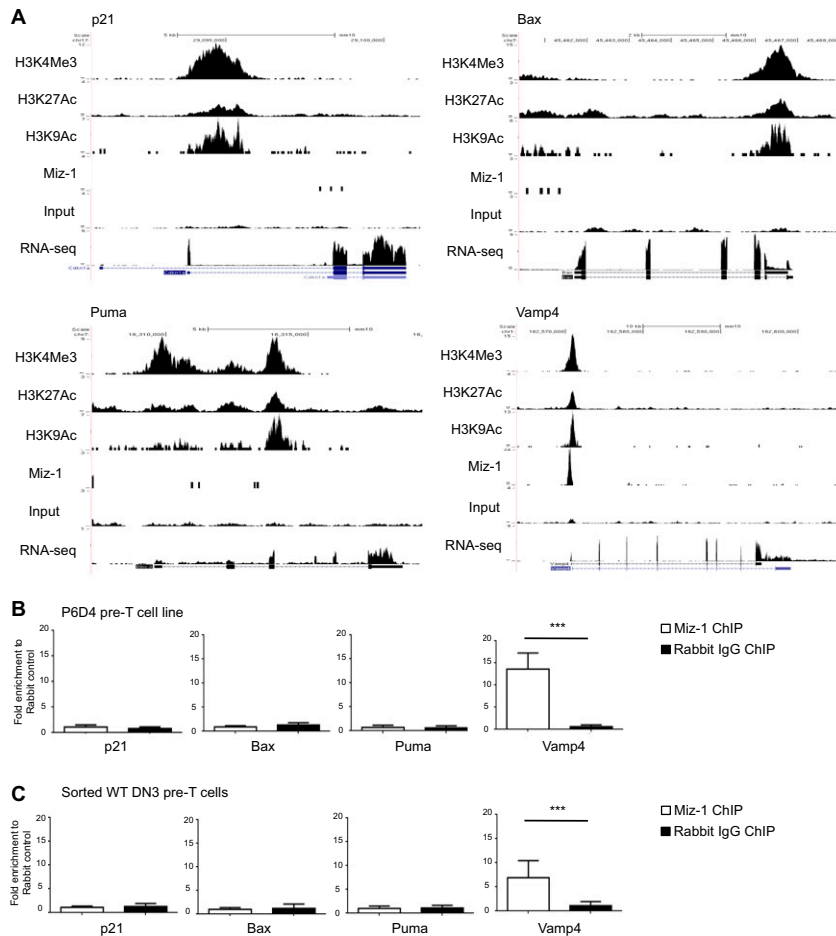

**Fig. S3.** Miz-1 does not directly regulate the expression of p53 target genes in DN3 pre-T cells. (A) ChIP-seq experiments for Miz-1 and histone activation marks (H3K4Me3, H3K27Ac, and H3K9Ac) in P6D4 murine pre-T cells. Shown are p53 target genes (*p21*, *Bax*, and *Puma*) and a positive control for Miz-1 binding and activation (*Vamp4*). Scale is in number of reads per million reads. (B) ChIP-qPCR experiments to determine possible binding of Miz-1 to the promoters of p53 target genes in murine P6D4 pre-T cells. Graph shows fold enrichment of anti-Miz-1 ChIP over rabbit IgG control ChIP. The *Vamp4* promoter contains a Miz-1-binding site and is used as a positive control for the Miz-1 ChIP. Data are represented as average fold change  $\pm$  SD from at least three independent experiments. (C) ChIP-qPCR experiments to determine possible binding of Miz-1 to the promoters of p53 target genes in sorted primary DN3 cells. Graph shows fold enrichment of anti-Miz-1 ChIP over rabbit IgG control ChIP. Data represent as average fold change  $\pm$  SD from at least three independent experiments.

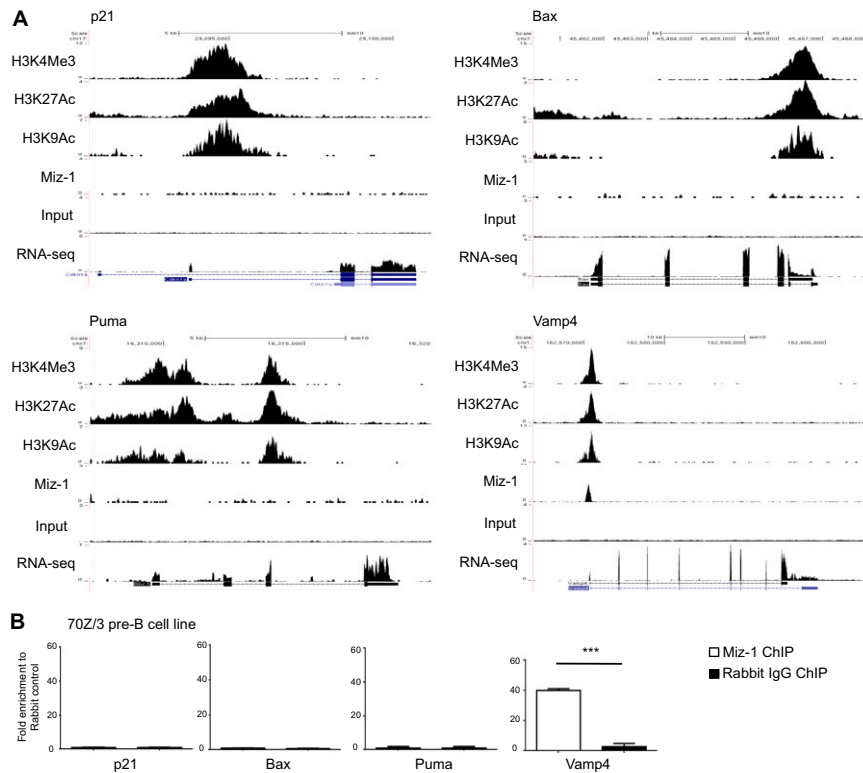

**Fig. S4.** Miz-1 does not directly regulate the expression of p53 target genes in pre-B cells. (A) ChIP-seq experiments for Miz-1 and histone activation marks (H3K4Me3, H3K27Ac, and H3K9Ac) in a 70Z/3 pre-B cell line. Shown are p53 target genes (*p21*, *Bax*, and *Puma*) and a positive control for Miz-1 binding and activation (*Vamp4*). Scale is in number of RPM. (B) ChIP-qPCR experiments to determine possible binding of Miz-1 to the promoters of p53 target genes in 70Z/3 pre-B cells. Graph shows fold enrichment of anti-Miz-1 ChIP over rabbit IgG control ChIP. The *Vamp4* promoter contains a Miz-1-binding site and serves as a positive control for the Miz-1 ChIP. Data represent average fold change  $\pm$  SD from at least three independent experiments.

**Table S1. qPCR primer sequences**

| Primer               | Sequence                    | Reference  |
|----------------------|-----------------------------|------------|
| Cdkn1a (p21) forward | AGATCCACAGCGATATCCAGAC      | (1)        |
| Cdkn1a (p21) reverse | ACCGAAGAGACAACGGCACACT      |            |
| Puma (Bbc3) forward  | ACGACCTCAACGCGCAGTACG       | (1)        |
| Puma (Bbc3) reverse  | GAGGAGTCCCATGAAGAGATTG      |            |
| Bax forward          | CAGGATGCGTCCACCAAGAA        | (1)        |
| Bax reverse          | AGTCCGTGTCCACGTCAGCA        |            |
| Gapdh forward        | TTCCGTGTTCTACCCCAATG        | (2)        |
| Gapdh reverse        | GGAGTTGCTGTTGAAGTCGCAG      |            |
| P53 forward          | AAGACAGGCAGACTTTTCGCC       | (3)        |
| P53 reverse          | CGGGTGGCTCATAAGGTACC        |            |
| Actin forward        | CTCTGGCTCTAGCACCATGAAGA     | (4)        |
| Actin reverse        | GTAAAACGCGAGCTCAGTAACAGTCCG |            |
| Rpl22 forward        | AGGTGCCTTTCTCCAAAAGGTATT    | This study |
| Rpl22 reverse        | AAACCACCGTTTTTGTCT          |            |
| Rpl221 forward       | TGGAGGTTTCATTGGACCTTAC      | (5)        |
| Rpl221 reverse       | TTCCAGTTTTTCCATTGACTTTAAC   |            |

- Li T, et al. (2012) Tumor suppression in the absence of p53-mediated cell-cycle arrest, apoptosis, and senescence. *Cell* 149(6):1269–1283.
- Kosan C, et al. (2010) Transcription factor miz-1 is required to regulate interleukin-7 receptor signaling at early commitment stages of B cell differentiation. *Immunity* 33(6):917–928.
- Hattangadi SM, Burke KA, Lodish HF (2010) Homeodomain-interacting protein kinase 2 plays an important role in normal terminal erythroid differentiation. *Blood* 115(23):4853–4861.
- Stephens AS, Stephens SR, Morrison NA (2011) Internal control genes for quantitative RT-PCR expression analysis in mouse osteoblasts, osteoclasts and macrophages. *BMC Res Notes* 4:410.
- O'Leary MN, et al. (2013) The ribosomal protein Rpl22 controls ribosome composition by directly repressing expression of its own paralog, Rpl221. *PLoS Genet* 9(8):e1003708.
